# Supplementary material for: Rapid and stable changes in maturation-related phenotypes of the adult hippocampal neurons by electroconvulsive treatment
Source: PubMed Central journal article supplement (PMC5335812; doi:10.1186/s13041-017-0288-9), 2017-03-02
Supplement: 13041_2017_288_MOESM1_ESM.pdf [file 13041_2017_288_MOESM1_ESM.pdf]

**Table S1.** Functional classification of the genes that showed reduced responsiveness 1 h after repeated ECS treatment compared with a single ECS on the basis of the gene ontology (GO) terms.

| <b>Reduced responsiveness after repeated ECS treatment</b> |                                                                      |            |                |
|------------------------------------------------------------|----------------------------------------------------------------------|------------|----------------|
| Genes increased by a single ECS (195 probes)               |                                                                      |            |                |
| <u>GO number</u>                                           | <u>GO term</u>                                                       | <u>No.</u> | <u>P value</u> |
| GO:0045944                                                 | positive regulation of transcription from RNA polymerase II promoter | 26         | 7.94E-08       |
| GO:0007623                                                 | circadian rhythm                                                     | 10         | 1.15E-07       |
| GO:0006355                                                 | regulation of transcription, DNA-templated                           | 40         | 3.59E-07       |
| GO:0000122                                                 | negative regulation of transcription from RNA polymerase II promoter | 21         | 4.79E-07       |
| GO:0035914                                                 | skeletal muscle cell differentiation                                 | 7          | 3.33E-06       |
| GO:0043066                                                 | negative regulation of apoptotic process                             | 16         | 2.18E-05       |
| GO:0051591                                                 | response to cAMP                                                     | 6          | 3.84E-05       |
| GO:0007179                                                 | transforming growth factor beta receptor signaling pathway           | 6          | 2.44E-04       |
| GO:0034976                                                 | response to endoplasmic reticulum stress                             | 6          | 2.60E-04       |
| GO:0071376                                                 | cellular response to corticotropin-releasing hormone stimulus        | 3          | 3.29E-04       |
| GO:0048661                                                 | positive regulation of smooth muscle cell proliferation              | 6          | 3.31E-04       |
| GO:0034097                                                 | response to cytokine                                                 | 6          | 3.50E-04       |
| GO:0032870                                                 | cellular response to hormone stimulus                                | 5          | 4.13E-04       |
| GO:0001701                                                 | in utero embryonic development                                       | 10         | 4.15E-04       |
| GO:0009416                                                 | response to light stimulus                                           | 4          | 8.30E-04       |
| Genes decreased by a single ECS (117 probes)               |                                                                      |            |                |
| <u>GO number</u>                                           | <u>GO term</u>                                                       | <u>No.</u> | <u>P value</u> |
| GO:0006355                                                 | regulation of transcription, DNA-templated                           | 25         | 9.15E-04       |

P-value was calculated by a modified Fisher's exact test. Highly associated gene ontology terms ( $P < 0.001$ ) were represented.

**Table S2.** Functional classification of the genes that showed similar responsiveness 1 h after repeated ECS treatment compared with a single ECS on the basis of the gene ontology (GO) terms

| <b>No significant change of responsiveness between a single and repeated ECS</b> |                                            |            |                |
|----------------------------------------------------------------------------------|--------------------------------------------|------------|----------------|
| Genes increased by a single ECS (122 probes)                                     |                                            |            |                |
| <u>GO number</u>                                                                 | <u>GO term</u>                             | <u>No.</u> | <u>P value</u> |
| GO:0043066                                                                       | negative regulation of apoptotic process   | 13         | 6.10E-05       |
| GO:0008360                                                                       | regulation of cell shape                   | 7          | 1.15E-04       |
| GO:0001525                                                                       | angiogenesis                               | 8          | 3.42E-04       |
| Genes decreased by a single ECS (933 probes)                                     |                                            |            |                |
| <u>GO number</u>                                                                 | <u>GO term</u>                             | <u>No.</u> | <u>P value</u> |
| GO:0006355                                                                       | regulation of transcription, DNA-templated | 164        | 2.23E-17       |
| GO:0006351                                                                       | transcription, DNA-templated               | 124        | 3.42E-10       |
| GO:0006974                                                                       | cellular response to DNA damage stimulus   | 36         | 8.72E-06       |
| GO:0006397                                                                       | mRNA processing                            | 29         | 3.09E-05       |
| GO:0006281                                                                       | DNA repair                                 | 27         | 1.63E-04       |
| GO:0032259                                                                       | methylation                                | 17         | 6.05E-04       |

P-value was calculated by a modified Fisher's exact test. Highly associated gene ontology terms ( $P < 0.001$ ) were represented.

**Table S3.** Functional classification of the genes that showed significantly increased expression change by only ECS treatment (317 gene probes) on the basis of the gene ontology (GO) terms

| <b>Increased change by only ECS-treatment (317 probes)</b> |                                  |            |                |
|------------------------------------------------------------|----------------------------------|------------|----------------|
| <u>GO number</u>                                           | <u>GO term</u>                   | <u>No.</u> | <u>P value</u> |
| GO:0006695                                                 | cholesterol biosynthetic process | 6          | 2.01E-05       |
| GO:0016126                                                 | sterol biosynthetic process      | 6          | 7.80E-05       |
| GO:0046942                                                 | carboxylic acid transport        | 9          | 1.24E-04       |
| GO:0015849                                                 | organic acid transport           | 9          | 1.33E-04       |
| GO:0048514                                                 | blood vessel morphogenesis       | 12         | 2.10E-04       |
| GO:0001568                                                 | blood vessel development         | 13         | 3.35E-04       |
| GO:0001944                                                 | vasculature development          | 13         | 4.19E-04       |
| GO:0006694                                                 | steroid biosynthetic process     | 7          | 6.95E-04       |

P-value was calculated by a modified Fisher's exact test. Highly associated gene ontology terms ( $P < 0.001$ ) were represented.

**Table S4.** Functional classification of the genes that showed significantly decreased expression change by only ECS treatment (444 gene probes) on the basis of the GO terms

| <b>Decreased change by only ECS-treatment (444 probes)</b> |                                                       |            |                |
|------------------------------------------------------------|-------------------------------------------------------|------------|----------------|
| <u>GO number</u>                                           | <u>GO term</u>                                        | <u>No.</u> | <u>P value</u> |
| GO:0006397                                                 | mRNA processing                                       | 31         | 3.39E-12       |
| GO:0008380                                                 | RNA splicing                                          | 23         | 4.12E-09       |
| GO:0006351                                                 | transcription, DNA-templated                          | 75         | 1.52E-08       |
| GO:0006355                                                 | regulation of transcription, DNA-templated            | 83         | 9.89E-08       |
| GO:0048025                                                 | negative regulation of mRNA splicing, via spliceosome | 6          | 1.51E-04       |
| GO:0006376                                                 | mRNA splice site selection                            | 5          | 1.87E-04       |

P-value was calculated by a modified Fisher's exact test. Highly associated gene ontology terms ( $P < 0.001$ ) were represented.

**Table S5.** Functional classification of the genes that showed significantly increased expression change by only SSRI treatment (690 gene probes) on the basis of the GO terms

| <b>Increased change by only SSRI-treatment (690 probes)</b> |                                        |            |                |
|-------------------------------------------------------------|----------------------------------------|------------|----------------|
| <u>GO number</u>                                            | <u>GO term</u>                         | <u>No.</u> | <u>P value</u> |
| GO:0001763                                                  | morphogenesis of a branching structure | 15         | 4.07E-05       |
| GO:0007242                                                  | intracellular signaling cascade        | 52         | 5.33E-05       |
| GO:0030029                                                  | actin filament-based process           | 16         | 4.77E-04       |
| GO:0006909                                                  | phagocytosis                           | 8          | 8.24E-04       |
| GO:0016055                                                  | Wnt receptor signaling pathway         | 13         | 8.56E-04       |
| GO:0008104                                                  | protein localization                   | 41         | 9.13E-04       |

P-value was calculated by a modified Fisher's exact test. Highly associated gene ontology terms ( $P < 0.001$ ) were represented.

**Table S6.** Functional classification of the genes that showed significantly decreased expression change by only SSRI treatment (739 gene probes) on the basis of the GO terms

| <b>Decreased change by only SSRI-treatment (739 probes)</b> |                         |            |                |
|-------------------------------------------------------------|-------------------------|------------|----------------|
| <u>GO number</u>                                            | <u>GO term</u>          | <u>No.</u> | <u>P value</u> |
| GO:0051276                                                  | chromosome organization | 8          | 3.80E-04       |
| GO:0006412                                                  | translation             | 29         | 9.60E-04       |

P-value was calculated by a modified Fisher's exact test. Highly associated gene ontology terms ( $P < 0.001$ ) were represented.
